# Supplementary material for: Intrinsic challenges in ancient microbiome reconstruction using 16S rRNA gene amplification
Source: PubMed Central journal article supplement (PMC4643231; doi:10.1038/srep16498), 2015-11-13
Supplement: srep16498-s1.pdf [file srep16498-s1.pdf]

Supplementary Information:

**Intrinsic challenges in ancient microbiome reconstruction using 16S rRNA gene amplification**

Kirsten A. Ziesemer<sup>1</sup>, Allison E. Mann<sup>2</sup>, Krithivasan Sankaranarayanan<sup>2</sup>, Hannes Schroeder<sup>1,3</sup>, Andrew T. Ozga<sup>2</sup>, Bernd W. Brandt<sup>4</sup>, Egija Zaura<sup>4</sup>, Andrea Waters-Rist<sup>1</sup>, Menno Hoogland<sup>1</sup>, Domingo C. Salazar-García<sup>5-7</sup>, Mark Aldenderfer<sup>8</sup>, Camilla Speller<sup>9</sup>, Jessica Hendy<sup>9</sup>, Darlene A. Weston<sup>1,10</sup>, Sandy J. MacDonald<sup>11</sup>, Gavin H. Thomas<sup>11</sup>, Matthew J. Collins<sup>9</sup>, Cecil M. Lewis, Jr.<sup>2</sup>, Corinne Hofman<sup>1</sup>, Christina Warinner<sup>2\*</sup>

<sup>1</sup>Faculty of Archaeology, Leiden University, Einsteinweg 2, 2333 CC, Leiden, the Netherlands

<sup>2</sup>Department of Anthropology, University of Oklahoma, Norman, OK, USA

<sup>3</sup>Center for Geogenetics, University of Copenhagen, Denmark

<sup>4</sup>Department of Preventive Dentistry, Academic Center for Dentistry Amsterdam, University of Amsterdam and VU University Amsterdam, the Netherlands

<sup>5</sup>Department of Anthropology, University of Cape Town, South Africa

<sup>6</sup>Departament de Prehistòria i Arqueologia, Universitat de València, Spain

<sup>7</sup>Department of Human Evolution, Max-Planck Institute for Evolutionary Anthropology, Leipzig, Germany

<sup>8</sup>School of Social Sciences, Humanities, and Arts, University of California, Merced, USA

<sup>9</sup>Department of Archaeology, University of York, York, UK

<sup>10</sup>Department of Anthropology, University of British Columbia, Vancouver, Canada

<sup>11</sup>Department of Biology, University of York, York, UK

\*Corresponding author

Correspondence to: [twarinner@gmail.com](mailto:twarinner@gmail.com)

**Supplementary Table 1** | Archaeological dental calculus specimens analyzed by amplicon sequencing

| Site           | Sample ID <sup>a</sup> | Age <sup>b</sup> | Sex <sup>c</sup> | Calculus score <sup>d</sup> | DNA yield (ng/mg) |
|----------------|------------------------|------------------|------------------|-----------------------------|-------------------|
| Middenbeemster | S029V0024              | -                | -                | 3                           | 47.0              |
| Middenbeemster | S047V0045              | EYA              | F                | 2                           | 23.4              |
| Middenbeemster | S051V0059              | OA               | M                | 2                           | 39.7              |
| Middenbeemster | S054V0051              | -                | -                | 2                           | 59.4              |
| Middenbeemster | S059V0133              | MA               | M                | 2                           | 54.0              |
| Middenbeemster | S060V0037              | EYA              | F                | 3                           | 70.2              |
| Middenbeemster | S100V0159              | OA               | M                | 3                           | 44.3              |
| Middenbeemster | S101V0131              | LYA              | F                | 3                           | 108.6             |
| Middenbeemster | S121V0211              | MA               | PF               | 3                           | 16.6              |
| Middenbeemster | S151V0666              | LYA              | F                | 1                           | 72.8              |
| Middenbeemster | S153V0435              | MA               | M                | 3                           | 82.0              |
| Middenbeemster | S155V0196              | OA               | M                | 3                           | 54.3              |
| Middenbeemster | S160V0613              | LYA              | F                | 1-2                         | 34.6              |
| Middenbeemster | S174V0408              | MA               | PF               | 3                           | 54.8              |
| Middenbeemster | S183V0311              | LYA              | F                | 1                           | 10.8              |
| Middenbeemster | S194V0440              | OA               | M                | 3                           | 81.6              |
| Middenbeemster | S216V0233              | MA               | F                | 2                           | 77.1              |
| Middenbeemster | S226V0282              | LYA              | M                | 2                           | 66.5              |
| Middenbeemster | S233V0304              | OA               | M                | 3                           | 68.1              |
| Middenbeemster | S236V0335              | EYA              | M                | 2                           | 81.8              |
| Middenbeemster | S239V0369              | EYA              | M                | 2-3                         | 42.5              |
| Middenbeemster | S240V0362 <sup>e</sup> | MA               | M                | 2                           | 57.6              |
| Middenbeemster | S242V0338              | OA               | M                | 2                           | 46.3              |
| Middenbeemster | S243V0381              | OA               | F                | 3                           | 57.9              |
| Middenbeemster | S249V0394              | LYA              | M                | 2-3                         | 54.1              |
| Middenbeemster | S251V0624              | MA               | M                | 1                           | 45.7              |
| Middenbeemster | S263V0445              | MA               | M                | 3                           | 37.1              |
| Middenbeemster | S270V1067              | EYA              | M                | 2                           | 113.7             |
| Middenbeemster | S275V0526 <sup>f</sup> | -                | -                | 2                           | 36.7              |
| Middenbeemster | S281V0542 <sup>e</sup> | MA               | PM               | 3                           | 29.8              |
| Middenbeemster | S285V0452              | OA               | M                | 3                           | 103.1             |
| Middenbeemster | S290V0472              | EYA              | M                | 3                           | 51.8              |
| Middenbeemster | S306V0561              | LYA              | M                | 2                           | <0.5              |
| Middenbeemster | S307V0591              | EYA              | F                | 3                           | 35.5              |
| Middenbeemster | S311V0956 <sup>e</sup> | EYA              | F                | 3                           | <0.5              |
| Middenbeemster | S313V0926              | MA               | M                | 2                           | 22.4              |
| Middenbeemster | S325V0670              | LYA              | M                | 2                           | 57.2              |
| Middenbeemster | S342V0737              | OA               | M                | 2                           | 23.2              |
| Middenbeemster | S345V0757              | LYA              | F                | 1                           | <0.5              |
| Middenbeemster | S347V0741              | OA               | M                | 3                           | 44.4              |
| Middenbeemster | S350V0884              | EYA              | F                | 2-3                         | 28.8              |
| Middenbeemster | S355V0748              | OA               | PF               | 3                           | 23.3              |
| Middenbeemster | S356V0864              | OA               | F                | 3                           | 34.7              |
| Middenbeemster | S363V0766              | OA               | M                | 2                           | 63.0              |
| Middenbeemster | S371V0790 <sup>f</sup> | MA               | M                | 2                           | 80.6              |
| Middenbeemster | S372V0808              | -                | F                | 2-3                         | 67.1              |
| Middenbeemster | S379V0851              | EYA              | M                | 2                           | 101.3             |
| Middenbeemster | S380V0821              | MA               | M                | 3                           | 83.6              |
| Middenbeemster | S383V0880              | MA               | F                | 1                           | 129.0             |
| Middenbeemster | S399V0872              | MA               | PM               | 3                           | 39.7              |
| Middenbeemster | S402V0907              | MA               | M                | 3                           | 107.1             |
| Middenbeemster | S405V0882              | MA               | F                | 3                           | 57.4              |
| Middenbeemster | S420V0936              | LYA              | F                | 3                           | 44.8              |
| Middenbeemster | S422V0962              | LYA              | F                | 3                           | 71.2              |
| Middenbeemster | S427V0938              | LYA              | M                | 2-3                         | 32.9              |
| Middenbeemster | S430V0965              | LYA              | F                | 2                           | 22.7              |
| Middenbeemster | S432V0981              | LYA              | M                | 2                           | 69.8              |
| Middenbeemster | S441V0932              | EYA              | F                | 2                           | 39.4              |
| Middenbeemster | S454V0963 <sup>g</sup> | EYA              | M                | 2                           | 60.5              |
| Middenbeemster | S460V0971              | -                | -                | 2                           | 100.7             |

| Site              | Sample ID <sup>a</sup>     | Age <sup>b</sup> | Sex <sup>c</sup> | Calculus score <sup>d</sup> | DNA yield (ng/mg) |
|-------------------|----------------------------|------------------|------------------|-----------------------------|-------------------|
| Middenbeemster    | S464V1012 <sup>e</sup>     | MA               | M                | 2                           | 42.0              |
| Middenbeemster    | S466V1010                  | MA               | F                | 2                           | 48.4              |
| Middenbeemster    | S467V1022                  | LYA              | M                | 3                           | 20.7              |
| Middenbeemster    | S473V1003                  | LYA              | M                | 2                           | 46.8              |
| Middenbeemster    | S474V0998                  | OA               | PF               | 3                           | 59.0              |
| Middenbeemster    | S482V1048                  | MA               | M                | 3                           | 65.5              |
| Middenbeemster    | S497V1059                  | LYA              | M                | 2                           | <0.5              |
| Middenbeemster    | S498V1071                  | OA               | F                | 2                           | 23.9              |
| Middenbeemster    | S501V1097                  | EYA              | F                | 2-3                         | 28.8              |
| Middenbeemster    | S502V1062                  | EYA              | M                | 2                           | 118.7             |
| Middenbeemster    | S504V1109                  | MA               | F                | 3                           | 21.9              |
| Middenbeemster    | S511V1126 <sup>f</sup>     | OA               | M                | 2                           | 11.5              |
| Middenbeemster    | S512V1105 <sup>f</sup>     | MA               | F                | 1                           | 22.7              |
| Middenbeemster    | S518V1086 <sup>f</sup>     | OA               | PF               | 3                           | 14.3              |
| Middenbeemster    | S520V1118                  | OA               | M                | 3                           | 37.3              |
| Middenbeemster    | S524V1120                  | MA               | M                | 3                           | 35.0              |
| Middenbeemster    | S538V1164                  | LYA              | PF               | 1                           | 16.5              |
| St. Helena        | STH219                     | LYA              | M                | 2                           | 1.7               |
| St. Helena        | STH268                     | A                | -                | 2-3                         | 0.5               |
| St. Helena        | STH276                     | EYA              | M                | 2-3                         | 0.9               |
| St. Helena        | STH319                     | A                | -                | 3-4                         | <0.5              |
| St. Helena        | STH423                     | MA               | M                | 2-3                         | 3.1               |
| St. Helena        | STH430                     | LYA              | M                | 4                           | 0.7               |
| St. Helena        | STH419                     | EYA              | F                | 3-4                         | 2.5               |
| St. Helena        | STH284                     | EYA              | F                | 1-2                         | 3.2               |
| St. Helena        | STH358                     | LYA              | M                | 1-2                         | 2.4               |
| St. Helena        | STH218                     | LYA              | PM               | 2-3                         | 0.6               |
| St. Helena        | STH359                     | EYA              | M                | 1-2                         | 1.4               |
| St. Helena        | STH389                     | EYA              | M                | 1-2                         | 1.9               |
| St. Helena        | STH474                     | MA               | M                | 2                           | 2.1               |
| St. Helena        | STH449                     | LYA              | M                | 2-3                         | 1.7               |
| St. Helena        | STH343                     | MA               | M                | 1-2                         | 1.8               |
| Lavoutte          | F67-31 <sup>h</sup>        | 36-45            | M                | 3                           | 3.3               |
| Lavoutte          | F67-33                     | 46+              | M                | 3                           | <0.5              |
| Lavoutte          | F68-04 <sup>i</sup>        | 26-35            | M                | 3                           | 13.9              |
| Lavoutte          | F69-01                     | 36-45            | M                | 3                           | 1.7               |
| Lavoutte          | F69-05 <sup>j</sup>        | 36-45            | U                | 3                           | 5.4               |
| Anse à la Gourde  | F0335                      | Adult            | F                | 3                           | <0.5              |
| Anse à la Gourde  | F0349 <sup>k</sup>         | 26-35            | M                | 3                           | 2.5               |
| Anse à la Gourde  | F0430 <sup>l</sup>         | 26-35            | F                | 3                           | 12.5              |
| Anse à la Gourde  | F0529                      | 18-25            | F                | 3                           | <0.5              |
| Anse à la Gourde  | F1948 <sup>g</sup>         | 46+              | M                | 1-2                         | 55.3              |
| Tickhill          | TKAC                       | 46+              | F                | 1-2                         | 140.7             |
| Tickhill          | TKDC                       | OA               | F                | 3                           | 33.5              |
| Tickhill          | TKEC                       | Adult            | M                | 2                           | 197.3             |
| Tickhill          | TKFC                       | Adult            | PM               | 3                           | 33.5              |
| Samdzong          | 37.UM2010.9 <sup>g,m</sup> | OA               | M                | 3                           | 46.2              |
| Camino del Molino | CMOL214 <sup>g,n</sup>     | Adult            | PF               | 4                           | 24.7              |

**Notes:**

<sup>a</sup>Sample ID refers to the site-specific burial or individual code.

<sup>b</sup>Age determined from analysis by A. Waters-Rist (Middenbeemster), D. Weston (Anse à la Gourde, Lavoutte), J. Eng (Samdzong), M. Haber and A. Avilés (Camino del Molino), A. Witkin and D. Swales (St. Helena), and M. Holst (Tickhill). Age estimated using morphological features, patterns of wear and degree of ossification of the pubic symphysis, auricular surface, cranial sutures, sternal rib end and dentition<sup>1-9</sup>. Age codes: EYA, early young adult; LYA, late young adult; MA, middle-aged adult; OA, older adult; -, not analyzed.

<sup>c</sup>Sex determined from analysis by A. Waters-Rist (Middenbeemster), D. Weston (Anse à la Gourde, Lavoutte), J. Eng (Samdzong), M. Haber and A. Avilés (Camino del Molino), A. Witkin and D. Swales (St. Helena), and M. Holst (Tickhill). Sex estimated using morphological features of the cranium, mandible and pelvic bone<sup>10-15</sup>. Sex codes: F, female; PF, probable female; M, male; PM, probable male; U, undetermined; -, not analyzed.

---

<sup>d</sup>Calculus severity determined by K. Ziesemer and reported using the Dobney and Brothwell scoring method <sup>2,16</sup>.

<sup>e</sup>Unlike the majority of Middenbeemster burials which date to 1829-1866 CE, this individual dates to an earlier period of the cemetery (1617-1829 CE).

<sup>f</sup>Date of individual not determined.

<sup>g</sup>Selected for shotgun sequencing

<sup>h</sup>Associated wood in grave radiocarbon dated to  $1000 \pm 40$  BP (cal CE 975-1155). Calibration program: Calib Rev 7.0.2. Calibration data set: Intcal 13.14c.

<sup>i</sup>Bone collagen radiocarbon dated to  $790 \pm 35$  BP (cal CE 1270-1395). Calibration program: Calib Rev 7.0.2. Calibration data set: Mixed Marine/No. Hem. (30% marine diet).

<sup>j</sup>Bone collagen radiocarbon dated to  $960 \pm 35$  BP (cal CE 1055-1085 [10%] or 1120-1266 [90%]). Calibration program: Calib Rev 7.0.2. Calibration data set: Mixed Marine/No. Hem. (30% marine diet).

<sup>k</sup>Bone collagen radiocarbon dated to  $975 \pm 30$  BP (cal CE 1055-1255). Calibration program: Calib Rev 7.0.2. Calibration data set: Mixed Marine/No. Hem. (30% marine diet).

<sup>l</sup>Bone collagen radiocarbon dated to  $1100 \pm 35$  BP (cal CE 990-1150). Calibration program: Calib Rev 7.0.2. Calibration data set: Mixed Marine/No. Hem. (30% marine diet).

<sup>m</sup>Additional bone collagen from the same tomb (Tomb 1) is radiocarbon dated to  $1440 \pm 15$  BP <sup>17,18</sup>.

<sup>n</sup>Additional bone collagen samples from the same burial assemblage are radiocarbon dated to  $4170 \pm 40$  BP,  $3850 \pm 40$  BP, and  $3900 \pm 40$  BP <sup>19</sup>.

**Supplementary Table 2.** 16S rRNA gene primer sequences analyzed in this study

| Hypervariable region | Primer pair <sup>a</sup> | Position in <i>E. coli</i> <sup>b</sup> | Primer sequences                                                 | Reference |
|----------------------|--------------------------|-----------------------------------------|------------------------------------------------------------------|-----------|
| V1                   | 8F/120R <sup>c</sup>     | 8-27; 101-120                           | F 5'-AGAGTTTGTATYMTGGCTCAG -3'<br>R 5'-TTACTCACCCGTNCGCCRCT-3'   | 20        |
| V1                   | 29F/98R*                 | 20-38; 107-127                          | F 5'-TGGCTCAGATTGAACGCTG-3'<br>R 5'-CCAGACATTACTCACCCGTCC-3'     | 21,22     |
| V1-V2                | 27F/338R                 | 8-27; 338-355                           | F 5'-AGAGTTTGTATCCTGGCTCAG-3'<br>R 5'-GCTGCCTCCCCTAGGAGT-3'      | 23        |
| V1-V2                | 27F/342R*                | 8-27; 342-357                           | F 5'-AGAGTTTGTATCCTGGCTCAG-3'<br>R 5'-CTGCTGCCTCCCCTAG-3'        | 24-26     |
| V3                   | 338F/531R*               | 320-339; 532-551                        | F 5'-AACTGAGACACGGTCCAGAC-3'<br>R 5'-ACGCTTGCACCCTCCGTATT-3'     | 25,26     |
| V3                   | 338F/533R*               | 338-358; 515-533                        | F 5'-ACTCCTACGGGAGGCAGCAGT-3'<br>R 5'-TTACCGCGGCTGCTGGCAC-3'     | 20        |
| V3                   | 351F/507R*               | 338-358; 515-536                        | F 5'-ACTCCTACGGGAGGCAGCAGT-3'<br>R 5'-GTATTACCGCGGCTGCTGGCAC-3'  | 27        |
| V3                   | U341F/534R*              | 341-357; 517-531                        | F 5'-CCTACGGGRSGCAGCAG-3'<br>R 5'-ACCGCGGCKGCTGGC-3'             | 28-30     |
| V4                   | 515F/806R                | 515-533; 787-806                        | F 5'-GTGCCAGCMGCCGCGGTAA-3'<br>R 5'-GGACTACHVGGGTWTCTAAT-3'      | 31,32     |
| V5                   | 800F/900R*               | 783-806; 908-927                        | F 5'-CAGGATTAGATACCCTGGTAGTCC-3'<br>R 5'-CCCGTCAATTCCTTTGAGTT-3' | 27        |
| V5                   | 785F/907R                | 785-805; 907-926                        | F 5'-GGATTAGATACCCBRGTAGTC-3'<br>R 5'-CCGTCAATTCMTTTRAGTTT-3'    | 33,34     |
| V6                   | 926F/1046R*              | 907-927; 1046-1064                      | F 5'-AAACTYAAKGAATTGACGGG-3'<br>R 5'-CGACARCCATGCASCACCT-3'      | 20        |
| V6                   | 917F/1061R               | 917-934; 1061-1080                      | F 5'-GAATTGACGGGRCCCGC-3'<br>R 5'-TCACGRACGAGCTGACGAC-3'         | 35,36     |
| V6                   | 958F/1044R*              | 941-964; 1052-1071                      | F 5'-GGTGGAGCATGTGGTTTAATTCGA-3'<br>R 5'-GAGCTGACGACAGCCATGCA-3' | 27        |

**Notes**

\*Primer pair has been previously used in ancient microbiome studies.

<sup>a</sup>Primer pair naming conventions have changed through time and are not consistent across studies.

<sup>b</sup>Position of primer start and stop coordinates relative to *Escherichia coli* Genbank accession J01695.

<sup>c</sup>The degenerate base I in the primer sequence was replaced with N prior to PrimerProspector analysis.

**Supplementary Table 3.** Frequency of *Methanobrevibacter* in archaeological dental calculus analyzed using amplicon (V3 U341F/534R) and shotgun metagenomics approaches

| Sample ID | Site              | Amplicon | Shotgun |
|-----------|-------------------|----------|---------|
| 454C      | Middenbeemster    | 12.497%  | 2.053%  |
| F1948C    | Anse à la Gourde  | 26.131%  | 2.158%  |
| 37C       | Samdzong          | 5.893%   | 0.627%  |
| 214C      | Camino del Molino | 6.554%   | 1.643%  |

**Supplementary Table 4 | Amplicon and shotgun sequencing statistics**

| Sample Name           | Library Type | Number of Reads | Number assigned to OTUs | Accession    |
|-----------------------|--------------|-----------------|-------------------------|--------------|
| <i>Modern</i>         |              |                 |                         |              |
| ModCalcControls1      | Amplicon     | 110567          | 97751                   | SAMN03400228 |
| ModCalcControls2      | Amplicon     | 106781          | 94562                   | SAMN03400229 |
| <i>Middenbeemster</i> |              |                 |                         |              |
| S047V0045             | Amplicon     | 123589          | 96150                   | SAMN03400234 |
| S051V0059             | Amplicon     | 100636          | 78534                   | SAMN03400235 |
| S054V0051             | Amplicon     | 100774          | 77230                   | SAMN03400236 |
| S059V0133             | Amplicon     | 100815          | 79359                   | SAMN03400237 |
| S060V0037             | Amplicon     | 87517           | 70334                   | SAMN03400238 |
| S100V0159             | Amplicon     | 68133           | 48212                   | SAMN03400239 |
| S101V0131             | Amplicon     | 89568           | 75559                   | SAMN03400240 |
| S121V0211             | Amplicon     | 56929           | 48143                   | SAMN03400242 |
| S151V0666             | Amplicon     | 74485           | 65993                   | SAMN03400243 |
| S153V0435             | Amplicon     | 303279          | 222300                  | SAMN03400244 |
| S155V0196             | Amplicon     | 42592           | 35596                   | SAMN03400245 |
| S160V0613             | Amplicon     | 105160          | 88927                   | SAMN03400246 |
| S174V0408             | Amplicon     | 173469          | 148124                  | SAMN03400247 |
| S183V0311             | Amplicon     | 137413          | 104328                  | SAMN03400248 |
| S194V0440             | Amplicon     | 58940           | 49914                   | SAMN03400249 |
| S216V0233             | Amplicon     | 151125          | 119385                  | SAMN03400250 |
| S226V0282             | Amplicon     | 127659          | 101297                  | SAMN03400251 |
| S233V0304             | Amplicon     | 105427          | 86389                   | SAMN03400252 |
| S236V0335             | Amplicon     | 106176          | 88127                   | SAMN03400253 |
| S239V0369             | Amplicon     | 85528           | 76561                   | SAMN03400254 |
| S240V0362             | Amplicon     | 151191          | 134259                  | SAMN03400255 |
| S242V0338             | Amplicon     | 174853          | 157259                  | SAMN03400256 |
| S243V0381             | Amplicon     | 82905           | 66577                   | SAMN03400257 |
| S249V0394             | Amplicon     | 160663          | 144886                  | SAMN03400258 |
| S251V0624             | Amplicon     | 75591           | 58050                   | SAMN03400259 |
| S263V0445             | Amplicon     | 83555           | 74930                   | SAMN03400260 |
| S270V1062             | Amplicon     | 70598           | 61277                   | SAMN03400261 |
| S275V0526             | Amplicon     | 103173          | 79146                   | SAMN03400262 |
| S281V0542             | Amplicon     | 115688          | 102029                  | SAMN03400263 |
| S285V0452             | Amplicon     | 98293           | 73272                   | SAMN03400264 |
| S290V0472             | Amplicon     | 119224          | 100402                  | SAMN03400265 |
| S307V0591             | Amplicon     | 119934          | 103220                  | SAMN03400266 |
| S311V0956             | Amplicon     | 82039           | 71668                   | SAMN03400267 |
| S313V0926             | Amplicon     | 115055          | 88275                   | SAMN03400268 |
| S325V0670             | Amplicon     | 132336          | 109210                  | SAMN03400269 |
| S342V0737             | Amplicon     | 51154           | 41759                   | SAMN03400270 |
| S345V0757             | Amplicon     | 109945          | 96770                   | SAMN03400271 |
| S347V0741             | Amplicon     | 71218           | 63178                   | SAMN03400272 |
| S350V0884             | Amplicon     | 98044           | 82518                   | SAMN03400273 |
| S355V0748             | Amplicon     | 168412          | 146504                  | SAMN03400274 |
| S356V0864             | Amplicon     | 144903          | 113533                  | SAMN03400275 |
| S363V0766             | Amplicon     | 150656          | 128858                  | SAMN03400276 |
| S371V0790             | Amplicon     | 125794          | 100469                  | SAMN03400277 |
| S372V0808             | Amplicon     | 131696          | 116247                  | SAMN03400278 |
| S379V0851             | Amplicon     | 93353           | 74280                   | SAMN03400279 |
| S380V0821             | Amplicon     | 103861          | 87173                   | SAMN03400282 |
| S383V0880             | Amplicon     | 95136           | 77196                   | SAMN03400283 |
| S399V0872             | Amplicon     | 103317          | 70611                   | SAMN03400284 |
| S402V0907             | Amplicon     | 107391          | 86077                   | SAMN03400285 |
| S405V0882             | Amplicon     | 79536           | 69498                   | SAMN03400286 |
| S420V0936             | Amplicon     | 59114           | 50136                   | SAMN03400287 |

| Sample Name              | Library Type | Number of Reads                 | Number assigned to OTUs | Accession    |
|--------------------------|--------------|---------------------------------|-------------------------|--------------|
| S422V0962                | Amplicon     | 119535                          | 97873                   | SAMN03400288 |
| S427V0938                | Amplicon     | 92832                           | 76970                   | SAMN03400289 |
| S430V0965                | Amplicon     | 114767                          | 92169                   | SAMN03400290 |
| S432V0981                | Amplicon     | 172782                          | 135288                  | SAMN03400291 |
| S441V0932                | Amplicon     | 43974                           | 34082                   | SAMN03400292 |
| S454C_V3                 | Amplicon     | 87209                           | 73419                   | SAMN03400293 |
| S460V0971                | Amplicon     | 64456                           | 54435                   | SAMN03400295 |
| S464V1012                | Amplicon     | 135664                          | 105963                  | SAMN03400296 |
| S466V1010                | Amplicon     | 109782                          | 95810                   | SAMN03400297 |
| S467V1022                | Amplicon     | 135436                          | 123901                  | SAMN03400298 |
| S473V1003                | Amplicon     | 97475                           | 77190                   | SAMN03400299 |
| S474V0998                | Amplicon     | 121534                          | 101809                  | SAMN03400300 |
| S482V1048                | Amplicon     | 97152                           | 78657                   | SAMN03400301 |
| S498V1071                | Amplicon     | 153805                          | 130014                  | SAMN03400302 |
| S501V1097                | Amplicon     | 108341                          | 92452                   | SAMN03400303 |
| S502V1062                | Amplicon     | 45150                           | 36842                   | SAMN03400304 |
| S504V1109                | Amplicon     | 39373                           | 33847                   | SAMN03400305 |
| S511V1126                | Amplicon     | 63006                           | 49369                   | SAMN03400306 |
| S512V1105                | Amplicon     | 148517                          | 120321                  | SAMN03400307 |
| S518V1086                | Amplicon     | 104062                          | 84879                   | SAMN03400308 |
| S520V1118                | Amplicon     | 86289                           | 71795                   | SAMN03400309 |
| S524V1120                | Amplicon     | 104795                          | 91677                   | SAMN03400310 |
| S538V1164                | Amplicon     | 91380                           | 79097                   | SAMN03400311 |
| 454C_SG                  | Shotgun      | 10176539 (total)<br>14931 (16S) | 11765                   | SAMN03400294 |
| <i>Tickhill</i>          |              |                                 |                         |              |
| TKAC                     | Amplicon     | 101204                          | 85897                   | SAMN03456835 |
| TKDC                     | Amplicon     | 104805                          | 59735                   | SAMN03456836 |
| TKEC                     | Amplicon     | 105726                          | 36879                   | SAMN03456837 |
| TKFC                     | Amplicon     | 130710                          | 76605                   | SAMN03456838 |
| <i>Samdzong</i>          |              |                                 |                         |              |
| 37C_V3                   | Amplicon     | 89494                           | 68253                   | SAMN03400280 |
| 37C_SG                   | Shotgun      | 9868955 (total)<br>17179 (16S)  | 13397                   | SAMN03400281 |
| <i>St. Helena</i>        |              |                                 |                         |              |
| STH218                   | Amplicon     | 222                             | 26                      | SAMN03456820 |
| STH419                   | Amplicon     | 616                             | 47                      | SAMN03456821 |
| STH343                   | Amplicon     | 9116                            | 1702                    | SAMN03456822 |
| STH319                   | Amplicon     | 9425                            | 1003                    | SAMN03456823 |
| STH358                   | Amplicon     | 31257                           | 1619                    | SAMN03456824 |
| STH284                   | Amplicon     | 33082                           | 20125                   | SAMN03456825 |
| STH449                   | Amplicon     | 35598                           | 5704                    | SAMN03456826 |
| STH389                   | Amplicon     | 43644                           | 12366                   | SAMN03456827 |
| STH219                   | Amplicon     | 52986                           | 14048                   | SAMN03456828 |
| STH423                   | Amplicon     | 67718                           | 14206                   | SAMN03456829 |
| STH359                   | Amplicon     | 70060                           | 10941                   | SAMN03456830 |
| STH474                   | Amplicon     | 87051                           | 16368                   | SAMN03456831 |
| STH268                   | Amplicon     | 90400                           | 14073                   | SAMN03456832 |
| STH359                   | Amplicon     | 92507                           | 7973                    | SAMN03456833 |
| STH430                   | Amplicon     | 96331                           | 45919                   | SAMN03456834 |
| <i>Camino del Molino</i> |              |                                 |                         |              |
| 214C_V3                  | Amplicon     | 114992                          | 90416                   | SAMN03400213 |
| 214C_SG                  | Shotgun      | 11384021 (total)<br>19552 (16S) | 15451                   | SAMN03400214 |



| Sample Name             | Library Type | Number of Reads                 | Number assigned to OTUs | Accession    |
|-------------------------|--------------|---------------------------------|-------------------------|--------------|
| <i>Anse à la Gourde</i> |              |                                 |                         |              |
| F0335                   | Amplicon     | 53417                           | 37935                   | SAMN03400217 |
| F0349-A                 | Amplicon     | 62256                           | 46173                   | SAMN03400218 |
| F0430                   | Amplicon     | 59713                           | 34934                   | SAMN03400219 |
| F0529                   | Amplicon     | 64071                           | 41271                   | SAMN03400220 |
| F1948C_V3               | Amplicon     | 102603                          | 78941                   | SAMN03400221 |
| F1948C_SG               | Shotgun      | 11832345 (total)<br>25418 (16S) | 20814                   | SAMN03400222 |
| <i>Lavoutte</i>         |              |                                 |                         |              |
| F67-31                  | Amplicon     | 58446                           | 38229                   | SAMN03400223 |
| F67-33                  | Amplicon     | 69578                           | 51500                   | SAMN03400224 |
| F68-04                  | Amplicon     | 27481                           | 15412                   | SAMN03400225 |
| F69-01                  | Amplicon     | 66280                           | 53838                   | SAMN03400226 |
| F69-05                  | Amplicon     | 23815                           | 14199                   | SAMN03400227 |
| <i>Lab Controls</i>     |              |                                 |                         |              |
| Benches                 | Amplicon     | 5037                            | 4617                    | SAMN03400212 |
| HandSurfaceSwabs        | Amplicon     | 21959                           | 20368                   | SAMN03400230 |
| <i>Blanks</i>           |              |                                 |                         |              |
| PCRBlank1               | Amplicon     | 31                              | 17                      | SAMN03400231 |
| PCRBlank2               | Amplicon     | 635                             | 190                     | SAMN03400232 |
| ExtractionBlank1        | Amplicon     | 726                             | 316                     | SAMN03400215 |

**Supplementary Table 5 | Accession IDs for samples used as source environments in this study.**

| Source | Accession                                                                                                                                                                                                                                                                                                                                                                                                                                                                                                                                                                                                                                                                                                                                                                                                                                                                                                                                                                                                                                                                                                                                                                                                                                                                                                                                                              | Database/Reference                                                                                                           |
|--------|------------------------------------------------------------------------------------------------------------------------------------------------------------------------------------------------------------------------------------------------------------------------------------------------------------------------------------------------------------------------------------------------------------------------------------------------------------------------------------------------------------------------------------------------------------------------------------------------------------------------------------------------------------------------------------------------------------------------------------------------------------------------------------------------------------------------------------------------------------------------------------------------------------------------------------------------------------------------------------------------------------------------------------------------------------------------------------------------------------------------------------------------------------------------------------------------------------------------------------------------------------------------------------------------------------------------------------------------------------------------|------------------------------------------------------------------------------------------------------------------------------|
| Oral   | SRS050640, SRS042857, SRS044978, SRS013699, SRS013729, SRS013723, SRS016853, SRS016880, SRS016877, SRS013456, SRS013474, SRS013472, SRS017115, SRS017142, SRS017139, SRS016337, SRS016364, SRS016361, SRS011588, SRS011604, SRS011601, SRS016525, SRS016543, SRS016541, SRS018084, SRS018102, SRS018100, SRS018435, SRS018453, SRS018451, SRS017402, SRS017420, SRS017418, SRS021978, SRS021996, SRS021994, SRS017529, SRS017547, SRS017545, SRS020298, SRS020316, SRS020314, SRS021117, SRS021135, SRS021133, SRS020877, SRS020895, SRS020893, SRS020592, SRS020610, SRS020608, SRS022041, SRS022059, SRS022057, SRS023373, SRS023391, SRS023389, SRS045314, SRS053216, SRS047667, SRS047327, SRS050114, SRS057608, SRS055141, SRS054669, SRS042093, SRS021492, SRS021510, SRS021508, SRS022866, SRS022884, SRS022882, SRS015817, SRS015835, SRS015833, SRS051166, SRS044700, SRS054441, SRS014803, SRS014821, SRS014819, SRS015293, SRS015311, SRS015309, SRS019091, SRS015472, SRS015470, SRS015350, SRS015368, SRS015366, SRS019783, SRS016283, SRS016281, SRS018735, SRS018753, SRS018751, SRS022554, SRS022572, SRS022570, SRS011159, SRS011175, SRS011173, SRS042483, SRS052681, SRS048589, SRS011357, SRS011373, SRS011371, SRS024273, SRS024291, SRS024289, SRS011504, SRS011520, SRS011518, SRS011482, SRS011496, SRS011494, SRS011407, SRS011571, SRS011569 | Human Microbiome Project, NCBI SRA database<br><a href="http://www.ncbi.nlm.nih.gov/sra">http://www.ncbi.nlm.nih.gov/sra</a> |
| Gut    | SRS016630, SRS016916, SRS016954, SRS017455, SRS018133, SRS018250, SRS018872, SRS019381, SRS020350, SRS020755, SRS020926, SRS021175, SRS021241, SRS021364, SRS022414, SRS022546, SRS022735, SRS022798, SRS023545, SRS023734, SRS023971, SRS024625, SRS024682, SRS042290, SRS042628, SRS042843, SRS045350, SRS045627, SRS047561, SRS047967, SRS048008, SRS048853, SRS049911, SRS050141, SRS055137, SRS056255, SRS056620                                                                                                                                                                                                                                                                                                                                                                                                                                                                                                                                                                                                                                                                                                                                                                                                                                                                                                                                                  |                                                                                                                              |
| Skin   | SRS053492, SRS013738, SRS016892, SRS017154, SRS016376, SRS011611, SRS016551, SRS049441, SRS045992, SRS017428, SRS017555, SRS020324, SRS020903, SRS020618, SRS022067, SRS023399, SRS051229, SRS054830, SRS015811, SRS014831, SRS015289, SRS015340, SRS016263, SRS018761, SRS022580, SRS011181, SRS048113, SRS013096, SRS024299, SRS011444, SRS011500, SRS011577                                                                                                                                                                                                                                                                                                                                                                                                                                                                                                                                                                                                                                                                                                                                                                                                                                                                                                                                                                                                         |                                                                                                                              |
| Soil   | AK.19.12a.414608, AK.19.12a.414616, AK.19.15a.414612, AK.19.18a.414617, FL.3.13a.414620, FL.3.14a.414607, FL.3.16a.414618, HI.20.11a.414613, HI.20.11a.414621, UT.15.42.414609, UT.15.42.414610, UT.15.44.414611, UT.15.45.414619                                                                                                                                                                                                                                                                                                                                                                                                                                                                                                                                                                                                                                                                                                                                                                                                                                                                                                                                                                                                                                                                                                                                      | NEON soils EMP, Study ID 808<br><a href="http://qitta.microbio.me">http://qitta.microbio.me</a>                              |

**Supplementary Table 6 | Relative abundance of genera obtained from analysis of single copy marker loci retrieved from shotgun metagenomic data.**

| Taxon                   | C214C_SG | S37C_SG | S454C_SG | F1948C_SG |
|-------------------------|----------|---------|----------|-----------|
| <i>Actinomyces</i>      | 0.198    | 0.19    | 0.223    | 0.093     |
| <i>Streptococcus</i>    | 0.179    | 0.134   | 0.037    | 0.167     |
| <i>Lautropia</i>        | 0.025    | 0.116   | 0.051    | 0.056     |
| <i>Campylobacter</i>    | 0.108    | 0.018   | 0.055    | 0.061     |
| <i>Bacteroidetes</i>    | 0.092    | 0.034   | 0.045    | 0.041     |
| <i>Tannerella</i>       | 0.041    | 0.009   | 0.091    | 0.008     |
| <i>Eikenella</i>        | 0.004    | 0.085   | 0.028    | 0.068     |
| <i>Eubacterium</i>      | 0.009    | 0.004   | 0.075    | 0.023     |
| <i>Gemella</i>          | 0.005    | 0.012   | 0.001    | 0.069     |
| <i>Cardiobacterium</i>  | 0.004    | 0.061   | 0.005    | 0.039     |
| <i>Neisseria</i>        | 0.03     | 0.057   | 0.025    | 0.061     |
| <i>Pseudoramibacter</i> | 0.001    | 0       | 0.04     | 0.001     |
| <i>Capnocytophaga</i>   | 0.008    | 0.037   | 0.014    | 0.022     |
| <i>Parvimonas</i>       | 0.039    | 0.004   | 0.005    | 0.065     |
| <i>Aggregatibacter</i>  | 0.005    | 0.03    | 0.003    | 0.032     |
| <i>Slackia</i>          | 0.032    | 0.001   | 0.006    | 0.001     |
| <i>Porphyromonas</i>    | 0.004    | 0.002   | 0.026    | 0.003     |
| <i>Corynebacterium</i>  | 0.006    | 0.02    | 0.017    | 0.025     |
| <i>Kingella</i>         | 0.002    | 0.02    | 0.006    | 0.013     |
| <i>Prevotella</i>       | 0.02     | 0.005   | 0.015    | 0.019     |
| <i>Selenomonas</i>      | 0.017    | 0.007   | 0.006    | 0.019     |
| <i>Rothia</i>           | 0.003    | 0.015   | 0.001    | 0.001     |
| <i>Treponema</i>        | 0.009    | 0.003   | 0.015    | 0.005     |
| <i>Catonella</i>        | 0.007    | 0.014   | 0.002    | 0.01      |
| <i>Pyramidobacter</i>   | 0.014    | 0.003   | 0.008    | 0         |
| <i>Leptotrichia</i>     | 0.011    | 0.006   | 0.004    | 0.009     |
| <i>Olsenella</i>        | 0.004    | 0.001   | 0.011    | 0.001     |
| <i>Desulfovibrio</i>    | 0.005    | 0.002   | 0.01     | 0         |
| <i>Fusobacterium</i>    | 0.006    | 0.005   | 0.003    | 0.009     |
| <i>Acidovorax</i>       | 0.001    | 0.006   | 0.008    | 0.005     |
| <i>Centipeda</i>        | 0.008    | 0.001   | 0.001    | 0.002     |
| <i>Filifactor</i>       | 0.001    | 0.001   | 0.008    | 0.001     |
| <i>Burkholderia</i>     | 0        | 0.007   | 0.005    | 0.001     |
| <i>Desulfomicrobium</i> | 0.002    | 0.001   | 0.007    | 0         |
| <i>Veillonella</i>      | 0.001    | 0.007   | 0        | 0.001     |
| <i>Abiotrophia</i>      | 0.006    | 0.001   | 0.003    | 0.006     |
| <i>Alicyclophilus</i>   | 0.001    | 0.003   | 0.004    | 0.006     |
| <i>Isoptericola</i>     | 0.004    | 0       | 0.006    | 0.001     |
| <i>Polaromonas</i>      | 0        | 0.006   | 0.004    | 0.003     |
| <i>Chlorobium</i>       | 0        | 0.005   | 0        | 0         |
| <i>Haemophilus</i>      | 0.002    | 0.005   | 0        | 0.005     |
| <i>Pseudomonas</i>      | 0.001    | 0.005   | 0        | 0         |
| <i>Ramlibacter</i>      | 0        | 0.005   | 0.005    | 0.002     |
| Others <sup>a</sup>     | 0.085    | 0.052   | 0.121    | 0.046     |

**Notes:**

In general, there is good taxonomic correlation between the results obtained from the mOTUs pipeline and the QIIME 16S rRNA pipeline for the shotgun metagenomics data ( $0.72 \pm 0.06$ , genus level).

<sup>a</sup>Genera with relative abundance less than 0.5% are combined in the category 'Others'.

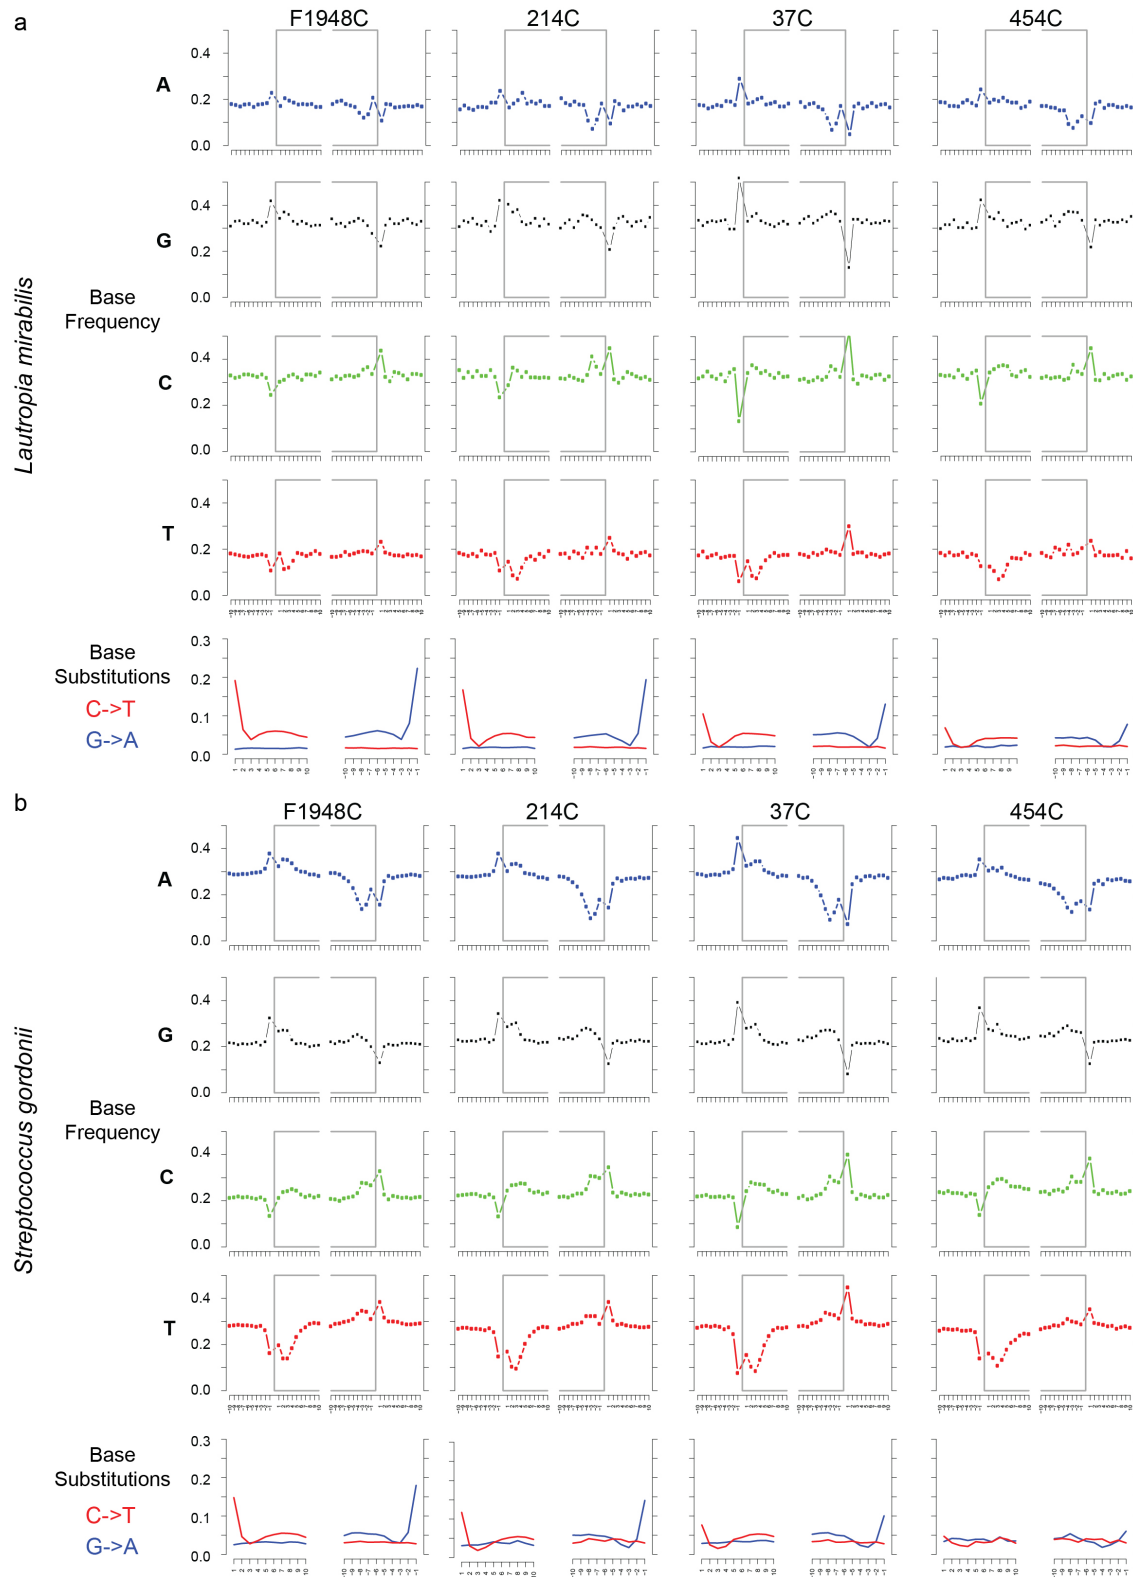

**Supplementary Figure 1 | Damage profiles for DNA sequences mapped to two oral bacterial species.** Shotgun metagenomics reads were mapped against reference genomes for (a) *Streptococcus gordonii* (NC\_009785), and (b) *Lautropia mirabilis* (GCA\_000186425). Fragmentation and misincorporation profiles were generated using the program 'mapDamage' (v2.0)<sup>37</sup>. Each column

represents one ancient dental calculus sample. The first four rows represent nucleotide frequencies for 10 bases upstream and downstream of the 5' and 3' regions of the sequenced DNA fragment. The fifth row represents misincorporation curves for (C->T) and (G->A) changes at the 5' and 3' regions of the sequenced DNA fragment. Samples are arranged from left to right by decreasing thermal age. All four ancient calculus samples show characteristic patterns of DNA fragmentation, with increased double-stranded breaks after purine (A and G) residues at the 5' end and before pyrimidine residues (T and C) at the 3' end of the aDNA molecules. Terminal nucleotide misincorporations (5' C->T; 3' G->A) were significantly more frequent samples of greater thermal age (Kruskal-Wallis,  $p < 0.01$ ).

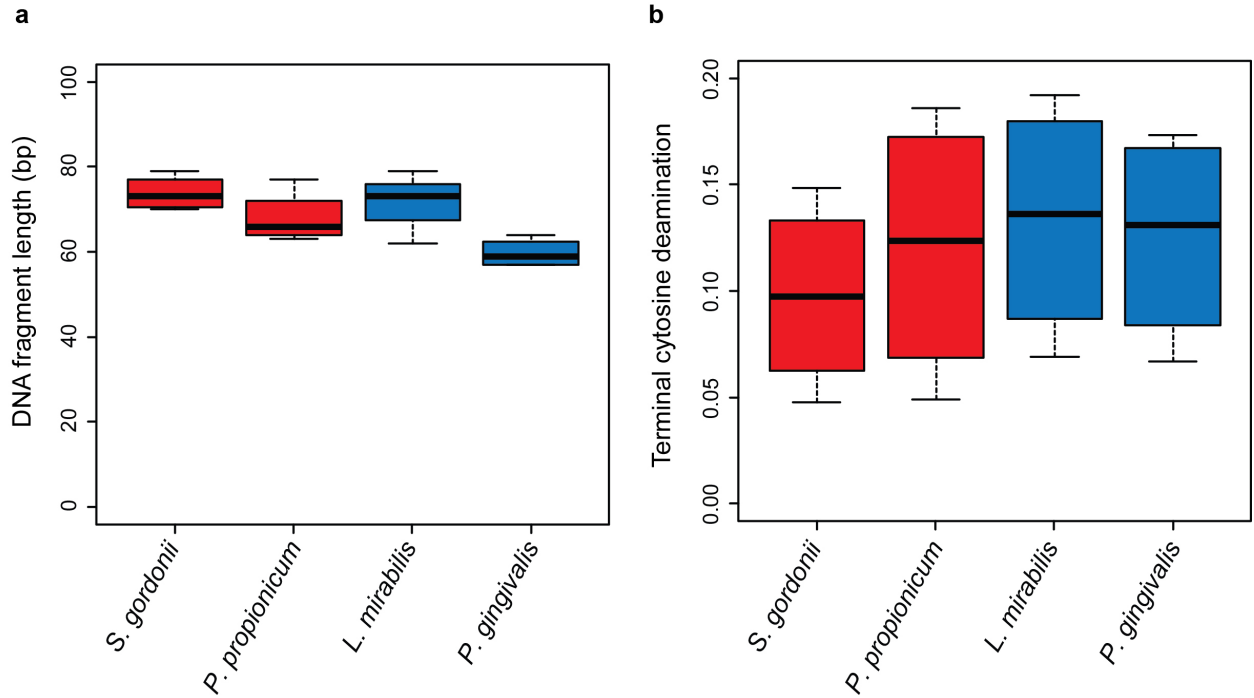

**Supplementary Figure 2 | Ancient DNA damage patterns for oral bacteria differing in cell wall composition.** Gram-positive taxa (*Streptococcus gordonii* and *Propionibacterium propionicum*) are shown in red; Gram-negative taxa (*Lautropia mirabilis* and *Porphyromonas gingivalis*) are shown in blue. **(a)** Median DNA fragment lengths differ among taxa (Kruskal-Wallis,  $p = 0.04$ ), but not by cell wall composition. **(b)** Terminal cytosine deamination rates also differ among taxa; however the differences are neither significant nor consistent with cell wall composition. For each taxon, box plots were generated from data from four ancient dental calculus samples (454C, 37C, 214C, F1948C). Shotgun metagenomic sequences were mapped against the *S. gordonii* (NC\_009785), *P. propionicum* (NC\_018142), *L. mirabilis* (GCA\_000186425), and *P. gingivalis* (NC\_002950) reference genomes.

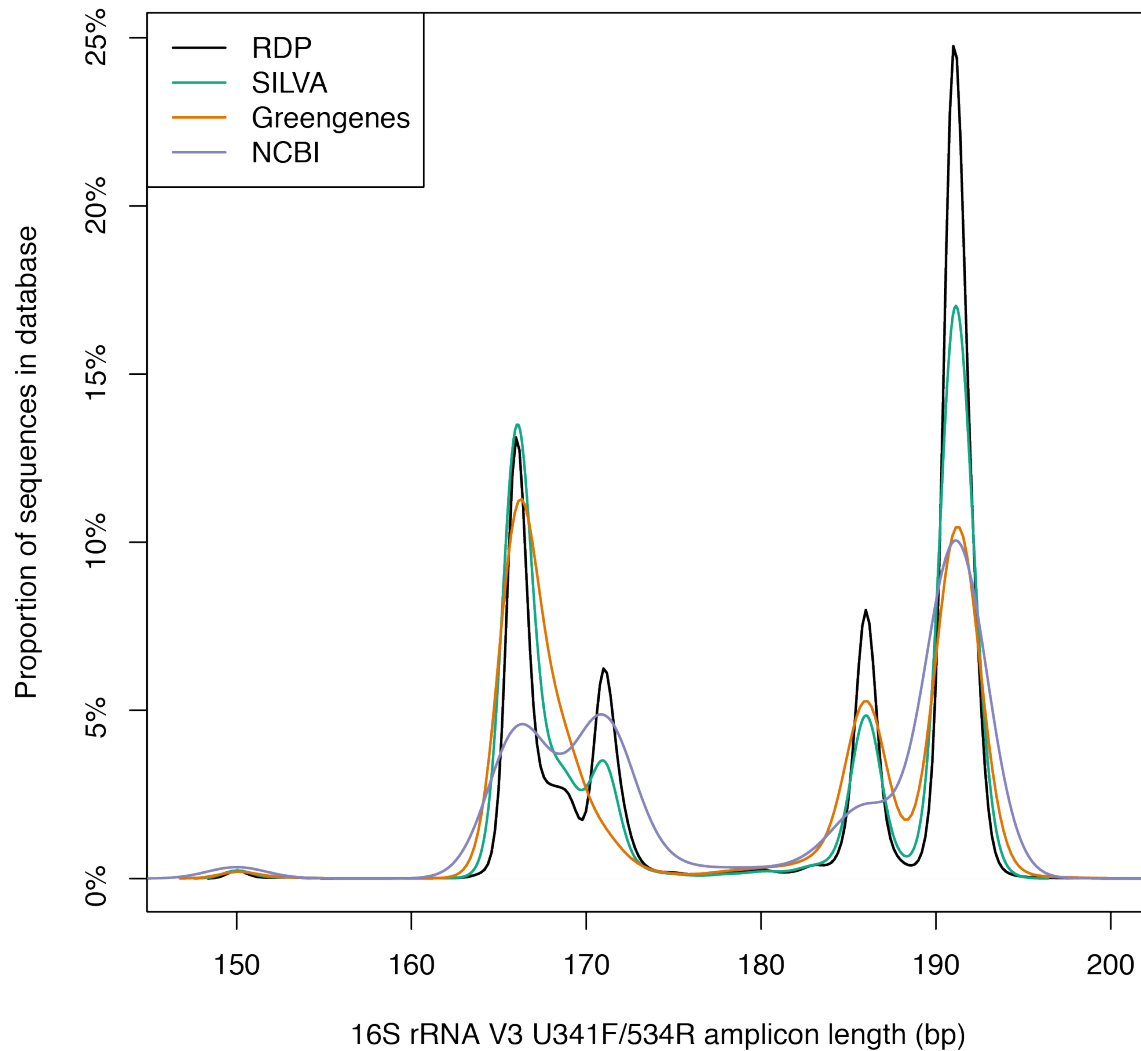

**Supplementary Figure 3 | Extensive length polymorphisms in V3 region of the 16S rRNA in multiple databases.** Histogram of the predicted amplicon lengths (bp) for the 16S rRNA gene V3 U341F/534R region is shown. Sequence data was obtained from RDP 11.3 (3,019,928 records), NCBI reference genomes (738,633 records; as of 2013-07-30), Greengenes 13 (1,049,116 records) and SILVA SSU 115 (3,194,778 records). A smoothed kernel density line was plotted over each V3 length histogram using R with default density bandwidth parameters. Predicted length polymorphisms are consistent across databases.

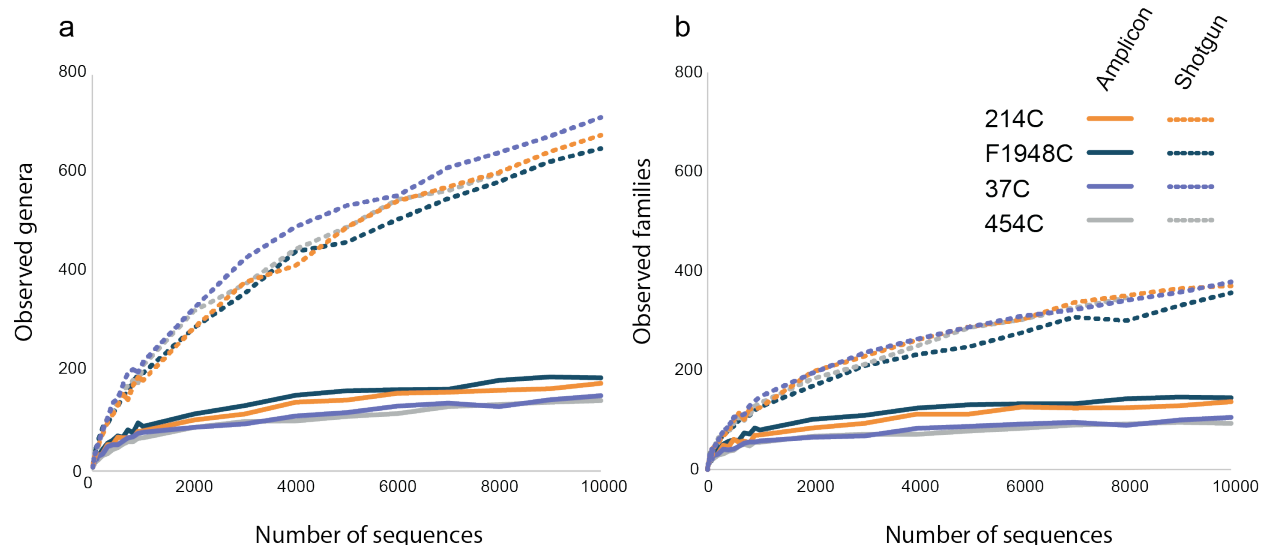

**Supplementary Figure 4 | Rarefaction curves for closed reference OTU tables generated from V3 region amplicons, and 16S reads filtered from shotgun metagenome sequencing for the four ancient dental calculus samples.** Rarefaction analyses were performed in QIIME<sup>38</sup> from OTU tables summarized at (a) Genus level. (b) Family level. Both amplicon and shotgun metagenome datasets are approaching plateau, but the shotgun metagenome datasets have increased diversity compared to the amplicon dataset. This is partially caused by the fact that the shotgun metagenome dataset contains a mixture of reads that map along the entire 16S rRNA gene, for which there is variation in OTU assignment information across the different variable regions, as described in Table 3.



## References

- 1 Brooks, S., Suchey, J.M. Skeletal age determination based on the os pubis: a comparison of the Acsádi-Nemeskéri and Suchey-Brooks methods. **5**, 227-238 (Human Evolution).
- 2 Brothwell, D. R. *Digging up bones : the excavation, treatment, and study of human skeletal remains*. 3rd edn, (Cornell University Press, 1981).
- 3 Buckberry, J. L. & Chamberlain, A. T. Age estimation from the auricular surface of the ilium: A revised method. *American journal of physical anthropology* **119**, 231-239 (2002).
- 4 Iscan, M. Y., Loth, S. R. & Wright, R. K. Metamorphosis at the Sternal Rib End - a New Method to Estimate Age at Death in White Males. *American journal of physical anthropology* **65**, 147-156 (1984).
- 5 Katz, D. & Suchey, J. M. Age determination of the male os pubis. *American journal of physical anthropology* **69**, 427-435 (1986).
- 6 Lovejoy, C. O., Meindl, R. S., Pryzbeck, T. R. & Mensforth, R. P. Chronological Metamorphosis of the Auricular Surface of the Ilium - a New Method for the Determination of Adult Skeletal Age at Death. *American journal of physical anthropology* **68**, 15-28 (1985).
- 7 Maat, G. J. Diet and age-at-death determinations from molar attrition. A review related to the low countries. *The Journal of forensic odonto-stomatology* **19**, 18-21 (2001).
- 8 Meindl, R. S. & Lovejoy, C. O. Ectocranial Suture Closure - a Revised Method for the Determination of Skeletal Age at Death Based on the Lateral-Anterior Sutures. *American journal of physical anthropology* **68**, 57-66 (1985).
- 9 Todd, T. W. Age Changes in the Pubic Bone. *American journal of physical anthropology* **4**, 1-70 (1921).
- 10 Anthropologists, W. o. E. Recommendations for Age and Sex Diagnoses of Skeletons. *Journal of human evolution* **9**, 517-& (1980).
- 11 Ascádi G, N. J. *History of Human Life Span and Mortality*. (Akadémiai Kiadó, 1970).
- 12 Buikstra, J. E. & Ubelaker, D. H. *Standards for data collection from human skeletal remains. Arkansas Archeological Survey Research Series*. (Arkansas Archeological Survey, 1994).
- 13 Iordanidis, P. Détermination du sexe par les os du squelette (atlas, axis, clavicule, omoplate, sternum). . *Annales de Médecine Légale* **41**, 280-291 (1961).
- 14 Phenice, T. W. A newly developed visual method of sexing the os pubis. *American journal of physical anthropology* **30**, 297-301 (1969).
- 15 Stewart, T. D. *Essentials of Forensic Anthropology Especially as Developed in the United States*. (Charles C. Thomas, 1979).
- 16 Dobney, K. & Brothwell, D. A Method for Evaluating the Amount of Dental Calculus on Teeth from Archaeological Sites. *Journal of Archaeological Science* **14**, 343-351 (1987).
- 17 Aldenderfer, M. Variation in mortuary practice on the early Tibetan plateau and the high Himalayas. *Journal of the International Association for Bon Research* **1**, 293-318 (2013).
- 18 Aldenderfer, M. Final Report: Archaeological research at Choedzom, Upper Mustang, Nepal Grant 8810-10. (National Geographic Society, 2010).
- 19 Lomba Maurandi, J., Martinez, M. L., Martinez, F. R. & Fernandez, A. A. The collective Chalcolithic burial of Camino del Molino (Caravaca de la Cruz, Murcia, Spain). Methodology and the first results of an exceptional archaeological site. *Trabajos Prehist* **66**, 143-159 (2009).
- 20 Adler, C. J. *et al*. Sequencing ancient calcified dental plaque shows changes in oral microbiota with dietary shifts of the Neolithic and Industrial revolutions. *Nature genetics* **45**, 450-455 (2013).
- 21 Luciani, S., Fornaciari, G., Rickards, O., Labarga, C. M. & Rollo, F. Molecular characterization of a pre-Columbian mummy and in situ coprolite. *American journal of physical anthropology* **129**, 620-629 (2006).
- 22 Ubaldi, M. *et al*. Sequence analysis of bacterial DNA in the colon of an Andean mummy. *American journal of physical anthropology* **107**, 285-295 (1998).
- 23 Ravel, J. *et al*. Vaginal microbiome of reproductive-age women. *Proceedings of the National Academy of Sciences of the United States of America* **108 Suppl 1**, 4680-4687 (2011).
- 24 Cano, R. J. *et al*. Sequence analysis of bacterial DNA in the colon and stomach of the Tyrolean Iceman. *American journal of physical anthropology* **112**, 297 (2000).
- 25 Rollo, F., Luciani, S., Canapa, A. & Marota, I. Analysis of bacterial DNA in skin and muscle of the

- Tyrolean iceman offers new insight into the mummification process. *American journal of physical anthropology* **111**, 211-219 (2000).
- 26 Rollo, F., Luciani, S., Marota, I., Olivieri, C. & Ermini, L. Persistence and decay of the intestinal microbiota's DNA in glacier mummies from the Alps. *Journal of archaeological science* **34**, 1294-1305 (2007).
- 27 Warinner, C. *et al.* Pathogens and host immunity in the ancient human oral cavity. *Nature genetics* **46**, 336-344 (2014).
- 28 Baker, G. C., Smith, J. J. & Cowan, D. A. Review and re-analysis of domain-specific 16S primers. *Journal of microbiological methods* **55**, 541-555 (2003).
- 29 Hansen, M. C., Tolker-Neilson, T., Givskov, M., Molin, S. Biased 16S rDNA PCR amplification caused by interference from DNA flanking template region. *FEMS Microbiol. Ecol.* **26**, 141-149 (1998).
- 30 Tito, R. Y. *et al.* Insights from characterizing extinct human gut microbiomes. *PloS one* **7**, e51146 (2012).
- 31 Caporaso, J. G. *et al.* Ultra-high-throughput microbial community analysis on the Illumina HiSeq and MiSeq platforms. *The ISME journal* **6**, 1621-1624 (2012).
- 32 Reysenbach, A. L., Wickham, G. S. & Pace, N. R. Phylogenetic analysis of the hyperthermophilic pink filament community in Octopus Spring, Yellowstone National Park. *Appl Environ Microbiol* **60**, 2113-2119 (1994).
- 33 Lane, D. J. *et al.* Rapid determination of 16S ribosomal RNA sequences for phylogenetic analyses. *Proceedings of the National Academy of Sciences of the United States of America* **82**, 6955-6959 (1985).
- 34 Zaura, E., Keijser, B. J. F., Huse, S. M. & Crielaard, W. Defining the healthy "core microbiome" of oral microbial communities. *BMC microbiology* **9**, 259 (2009).
- 35 Crielaard, W. *et al.* Exploring the oral microbiota of children at various developmental stages of their dentition in the relation to their oral health. *BMC medical genomics* **4**, 22 (2011).
- 36 Keijser, B. J. F. *et al.* Pyrosequencing analysis of the oral microflora of healthy adults. *Journal of dental research* **87**, 1016-1020 (2008).
- 37 Jonsson, H., Ginolhac, A., Schubert, M., Johnson, P. L. & Orlando, L. mapDamage2.0: fast approximate Bayesian estimates of ancient DNA damage parameters. *Bioinformatics* **29**, 1682-1684 (2013).
- 38 Kuczynski, J. *et al.* Using QIIME to analyze 16S rRNA gene sequences from microbial communities. *Current protocols in microbiology* **Chapter 1**, Unit 1E 5 (2012).
